# Supplementary material
Source: Springer Nature journal article supplement (https://www.springermedizin.de/resource/supplementary/12879_2010_1516_MOESM1_ESM.pdf/9442692)

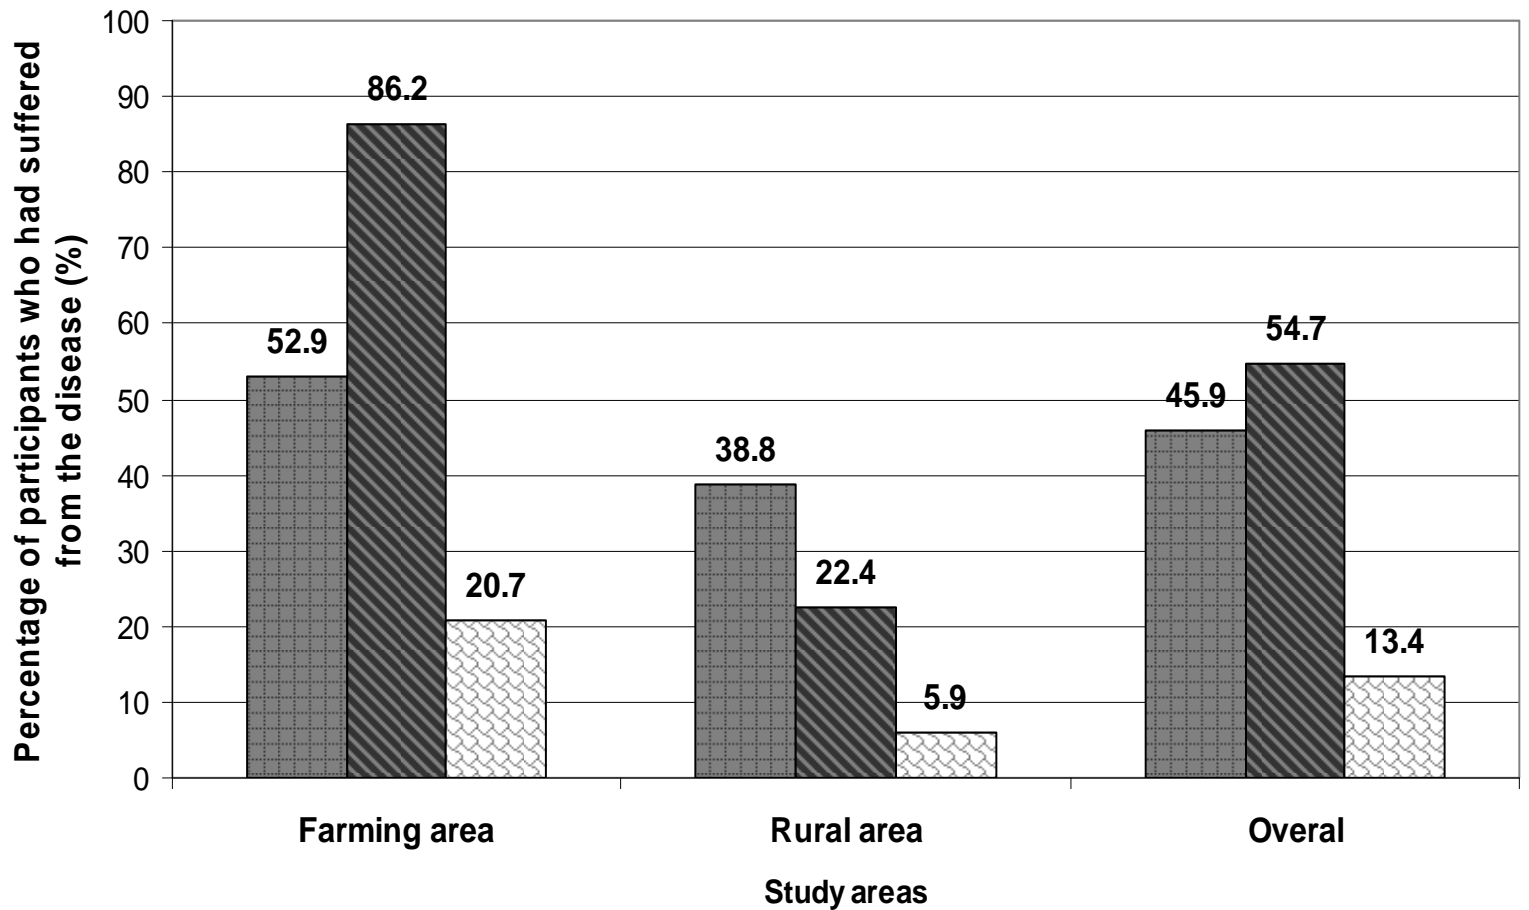

■ Schistosomiasis ■ Malaria ■ STHs

Supplement: MOESM1 [file 9442692]
